# Supplementary material for: Divergent predictions of carbon storage between two global land models:attribution of the causes through traceability analysis
Source: Copernicus journal article supplement (doi:10.5194/esd-7-649-2016), 2016-07-29
Supplement: Supplementary file 1 [file esd-7-649-2016-supplement.pdf]

Supplement of Earth Syst. Dynam., 7, 649–658, 2016  
<http://www.earth-syst-dynam.net/7/649/2016/>  
doi:10.5194/esd-7-649-2016-supplement  
© Author(s) 2016. CC Attribution 3.0 License.

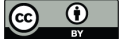

*Supplement of*

## **Divergent predictions of carbon storage between two global land models: attribution of the causes through traceability analysis**

**Rashid Rafique et al.**

*Correspondence to:* Rashid Rafique (rashidbao@gmail.com) and Yiqi Luo (yluo@ou.edu)

The copyright of individual parts of the supplement might differ from the CC-BY 3.0 licence.

Supplementary Material

Table 1. Translation of plant functional types from CLM-CASA' to CABLE biomes

| CLM-CASA' PFT                       | CABLE-compatible biome      |
|-------------------------------------|-----------------------------|
| needleleaf evergreen temperate tree | evergreen needleleaf forest |
| needleleaf evergreen boreal tree    | evergreen needleleaf forest |
| needleleaf deciduous boreal tree    | deciduous needleleaf forest |
| broadleaf evergreen tropical tree   | evergreen broadleaf forest  |
| broadleaf evergreen temperate tree  | evergreen broadleaf forest  |
| broadleaf deciduous tropical tree   | deciduous broadleaf forest  |
| broadleaf deciduous temperate tree  | deciduous broadleaf forest  |
| broadleaf deciduous boreal tree     | deciduous broadleaf forest  |
| broadleaf evergreen shrub           | shrubland                   |
| broadleaf deciduous temperate shrub | shrubland                   |
| broadleaf deciduous boreal shrub    | shrubland                   |
| c3 arctic grass                     | tundra                      |
| c3 non-arctic grass                 | c3 grassland                |
| c4 grass                            | c4 grassland                |
